# Supplementary material for: Exosomal miR-320d promotes angiogenesis and colorectal cancer metastasis via targeting GNAI1 to affect the JAK2/STAT3 signaling pathway
Source: PubMed Central journal article supplement (PMC11655962; doi:10.1038/s41419-024-07297-y), 2024-12-18

# Figure 1

## C

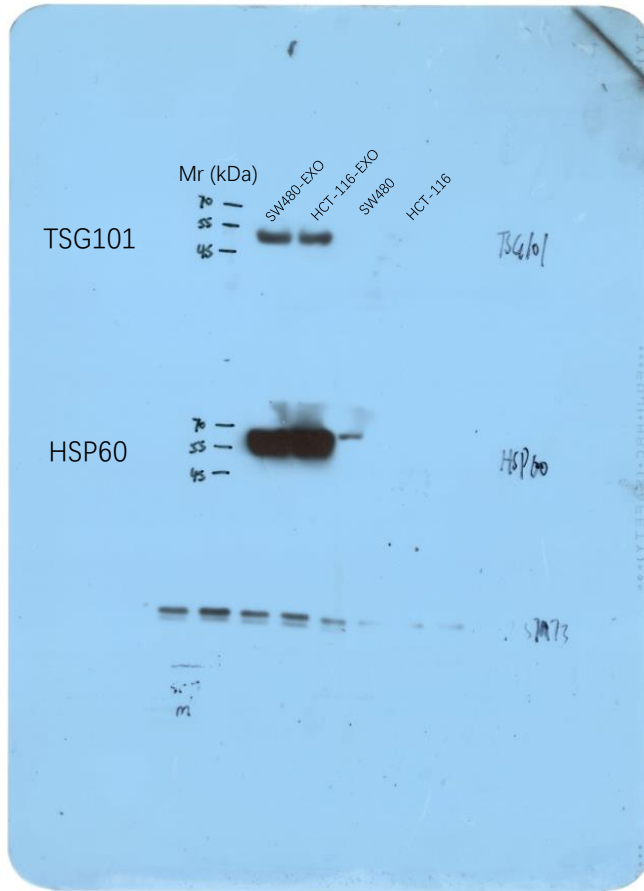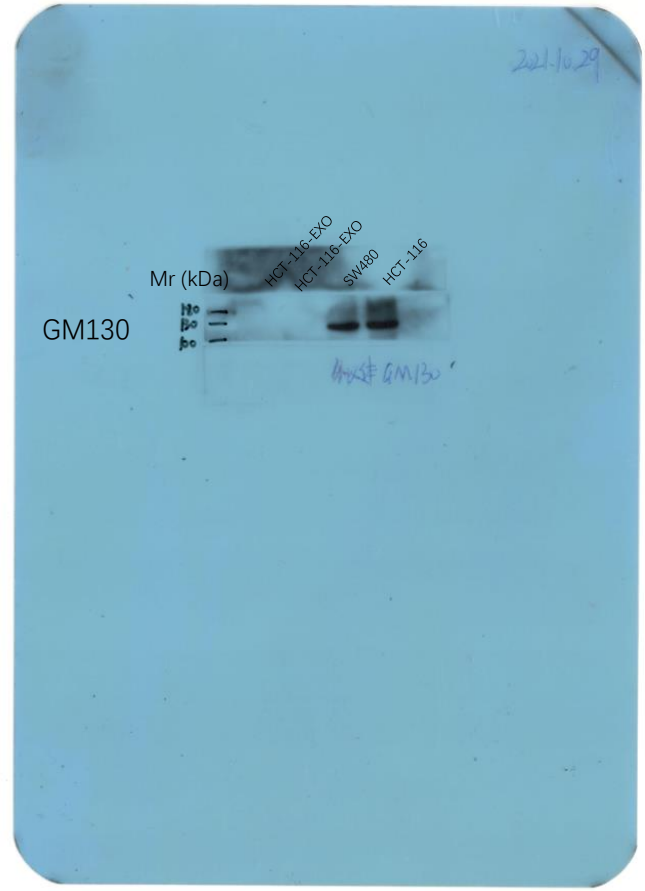

# Figure 5

## F

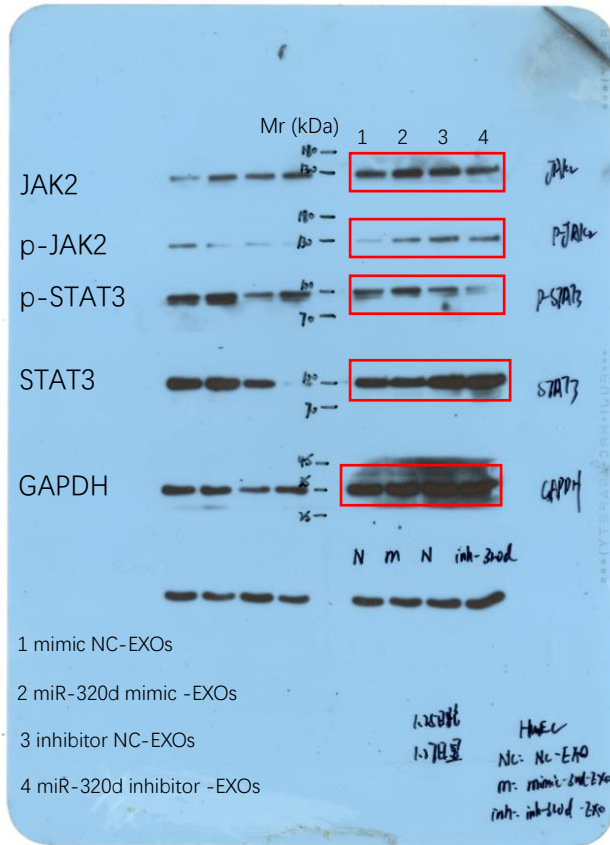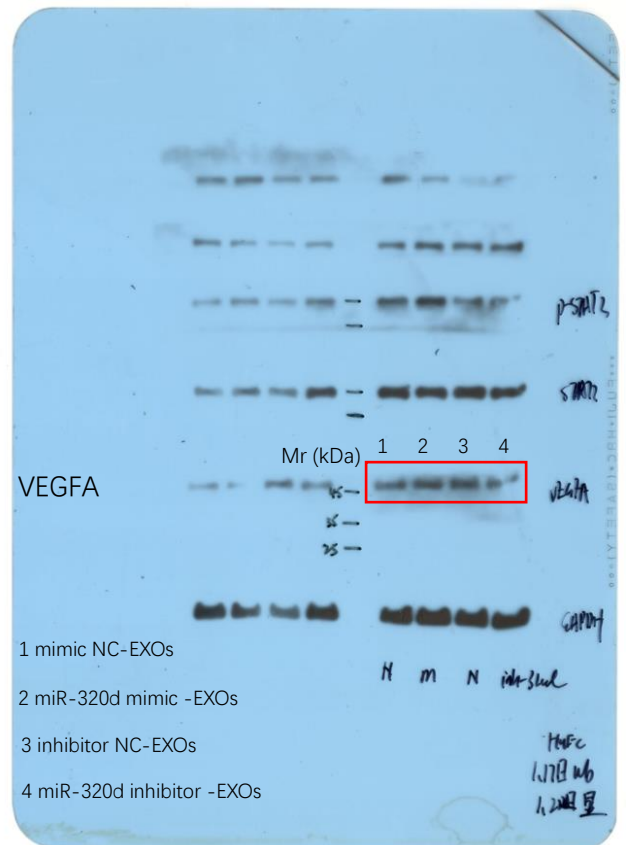

# Figure 7

## G

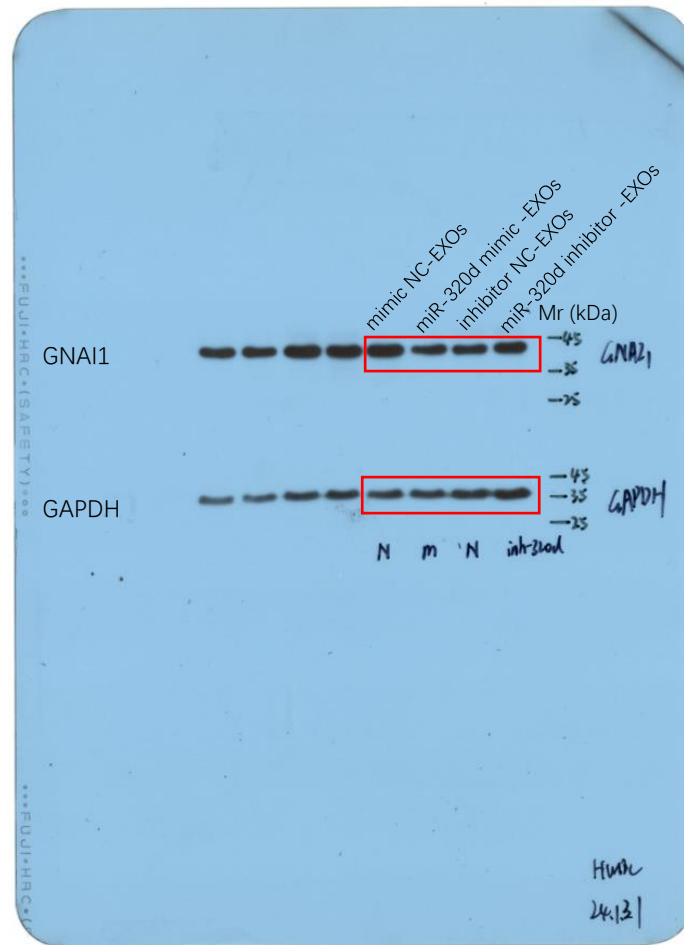

# Figure 8

## E

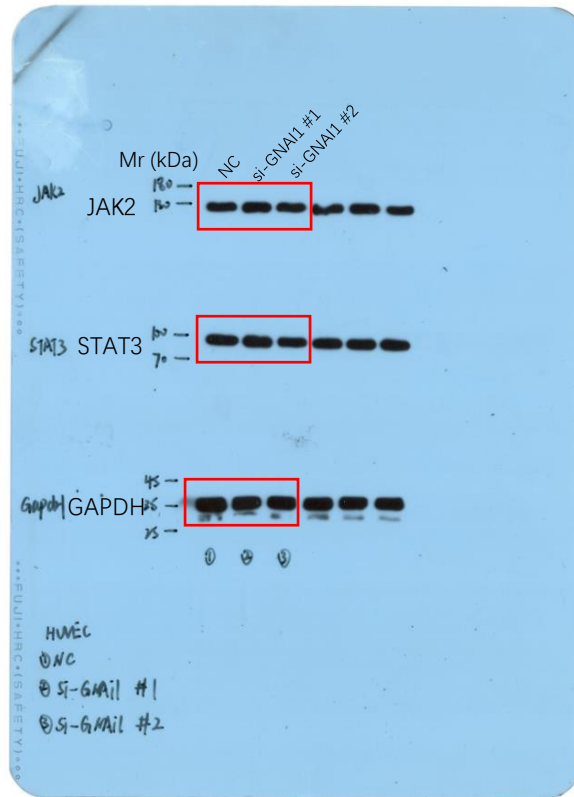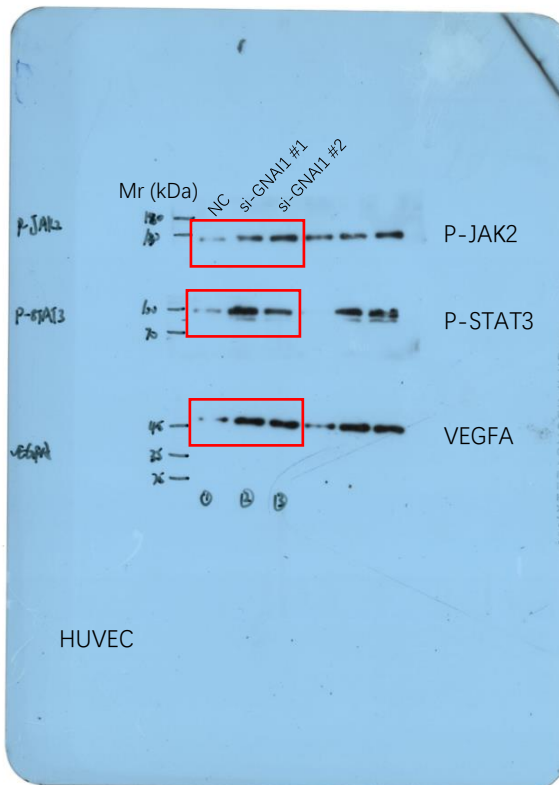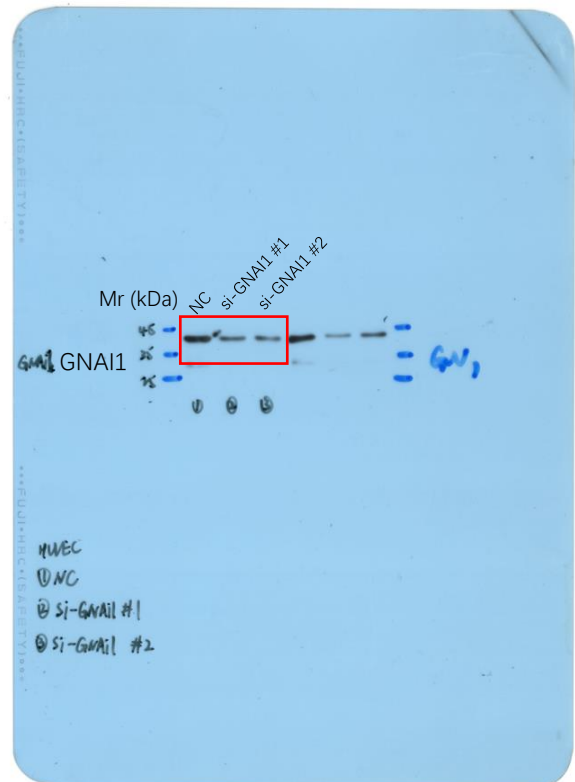

# Figure 9

## D

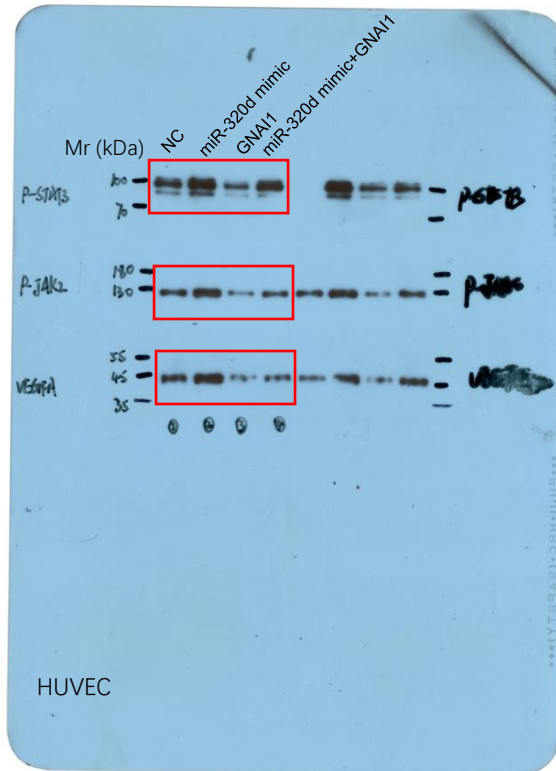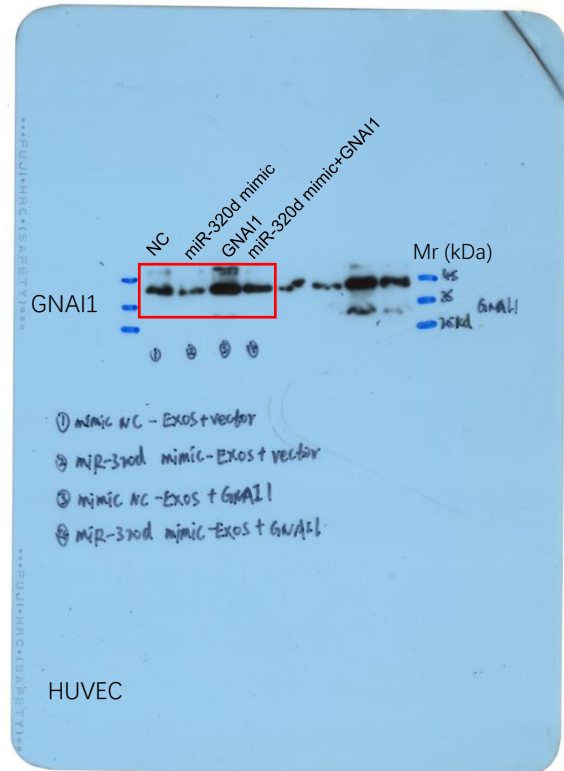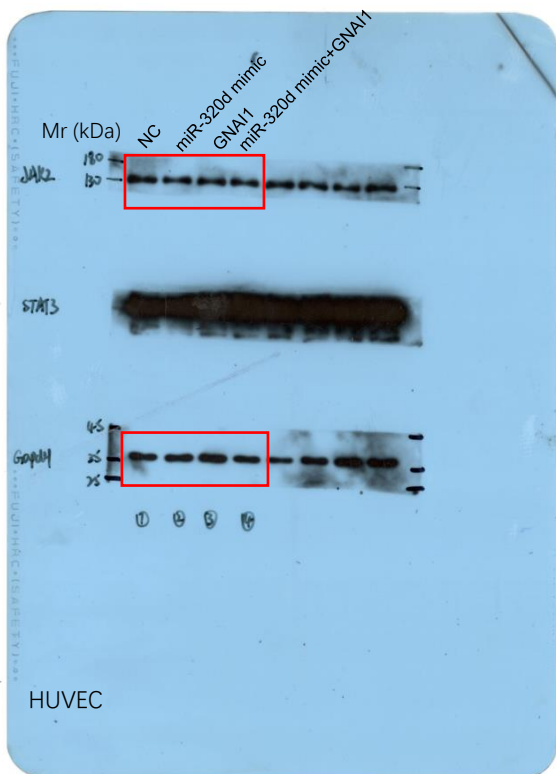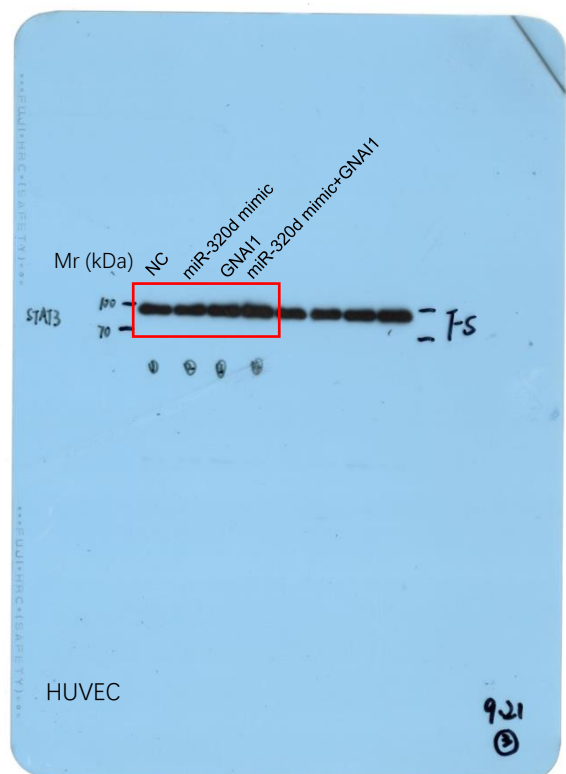

Supplement: 41419_2024_7297_MOESM2_ESM.pdf [file 41419_2024_7297_MOESM2_ESM.pdf]
